# Supplementary material for: Silica nanoparticle accumulation in plants: current state and future perspectives
Source: Royal Society of Chemistry journal article supplement (doi:10.1039/d3nr02221h), 2023-01-01
Supplement: d3nr02221h1.pdf [file d3nr02221h1.pdf]

21 **Table S1.** The content of Si in different crops.<sup>1</sup>

| Crop      | Si content (% dry matter) |
|-----------|---------------------------|
| Rice      | 4.2                       |
| Wheat     | 2.5                       |
| Barely    | 1.8                       |
| Sugarcane | 1.5                       |
| Soybean   | 1.4                       |
| Corn      | 0.8                       |
| Cassava   | 0.5                       |

22

23

24 **Table S2.** Distribution of Si in different parts of oat plants.<sup>2</sup>

| Plant part                          | Si content (% dry matter) |
|-------------------------------------|---------------------------|
| Leaf blade                          | 2.48                      |
| Leaf sheath                         | 1.9                       |
| Culm                                | 0.48                      |
| Inflorescence (excluding caryopsis) | 3.6                       |
| Caryopsis                           | 0.03                      |
| Miscellaneous (secondary tillers)   | 1.93                      |
| Whole tops                          | 1.37                      |

25

26 **Reference**

- 27 1. S. Maryam and A. Gul, In *Plant Metal and Metalloid Transporters*, Springer Science, 2022,  
 28 **12**, 245–273.
- 29 2. L. H. P. Jones, and K. A. Handreck, *Adv. Agron.* 1967, **19**, 107–149

30

31

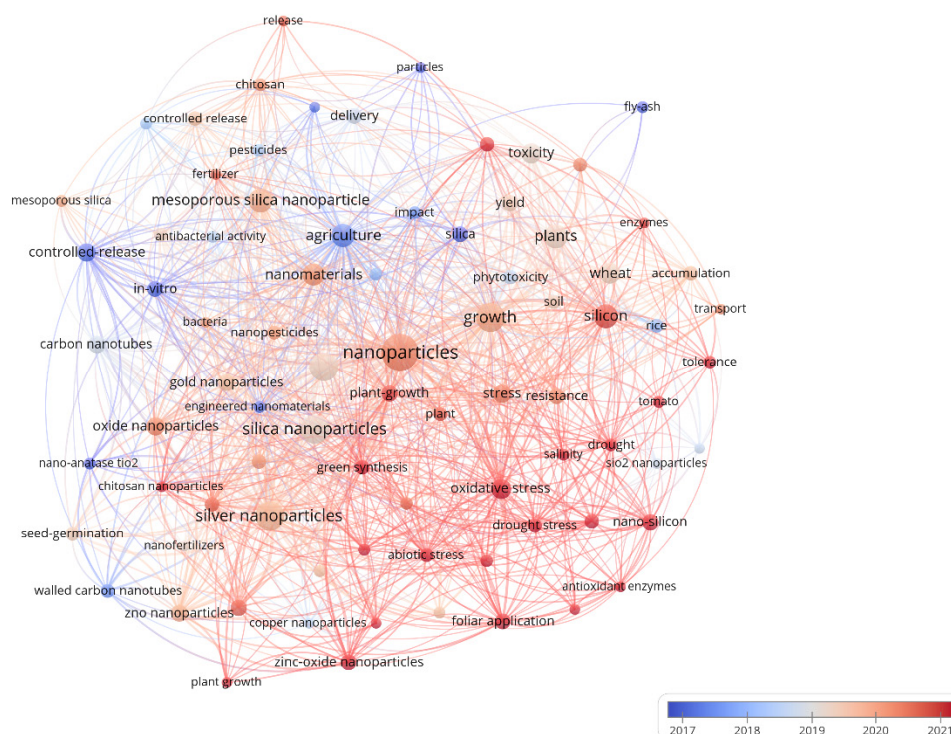

32

33 **Figure S1.** Co-occurrence analysis of keywords related to the publication trends on silica  
34 nanoparticles (SiO<sub>2</sub> NPs) and plants conducted using VOSviewer 1.6.18. Syntax in the topic  
35 search: "TS = ((“nano SiO<sub>2</sub>” OR ((Si or SiO<sub>2</sub>) AND (nanoparticle\* OR particle\*)) OR ((silicon  
36 or silica) AND (nanoparticle\* OR particle\*))) AND (plant) AND (agriculture\*))". The  
37 frequency of keyword occurrence is represented by the size of the circle; the links depict the  
38 connections among keywords. The color of the circles and links reflects the year, as indicated  
39 in the color bar.
